# Supplementary material
Source: PubMed Central journal article supplement (PMC6618123)
Supplement: ANA-84-51-s001.pdf [file ANA-84-51-s001.pdf]

Supplementary Table 1: Discovery cohort PPMS patients and 2010 International Panel Criteria

| Patient ID  | Sex | Age of onset | Progression since onset without relapses | Elevated IgG index | Oligoclonal bands (OCBs) | Positive CSF (OCBs or elevated IgG index) | Brain lesions consistent with MS | Spinal cord lesions consistent with MS | Gadolinium enhancement on MRI | Meets 2010 International Panel Criteria for PPMS | Whole-genome sequencing (CGI) | MS Replication Chip | Peripheral neuropathy in medical history | Family history of MS | Family history of other neurologic disorders | Family history notes                                                                                   |
|-------------|-----|--------------|------------------------------------------|--------------------|--------------------------|-------------------------------------------|----------------------------------|----------------------------------------|-------------------------------|--------------------------------------------------|-------------------------------|---------------------|------------------------------------------|----------------------|----------------------------------------------|--------------------------------------------------------------------------------------------------------|
| 020020-0001 | F   | 26           | +                                        | +                  | +                        | +                                         | +                                | ND                                     | -                             | Yes                                              | +                             | -                   | -                                        | -                    | -                                            |                                                                                                        |
| 020069-0001 | F   | 37           | +                                        | ND                 | ND                       | ND                                        | +                                | +                                      | -                             | Yes                                              | +                             | -                   | -                                        | -                    | -                                            |                                                                                                        |
| 041130-0001 | F   | 48           | +                                        | +                  | +                        | +                                         | +                                | +                                      | -                             | Yes                                              | +                             | -                   | -                                        | -                    | -                                            |                                                                                                        |
| 041225-0001 | F   | 51           | +                                        | +                  | +                        | +                                         | +                                | +                                      | -                             | Yes                                              | +                             | -                   | -                                        | -                    | -                                            |                                                                                                        |
| 041247-0001 | F   | 49           | +                                        | +                  | +                        | +                                         | +                                | +                                      | -                             | Yes                                              | +                             | -                   | -                                        | -                    | -                                            |                                                                                                        |
| 041282-0001 | F   | 46           | +                                        | +                  | +                        | +                                         | +                                | +                                      | -                             | Yes                                              | +                             | -                   | -                                        | -                    | -                                            | Mother with parkinsonism                                                                               |
| 041377-0001 | M   | 33           | +                                        | ND                 | +                        | +                                         | +                                | -                                      | -                             | Yes                                              | +                             | -                   | -                                        | -                    | -                                            | Father with Alzheimer's                                                                                |
| 041854-0001 | F   | 45           | +                                        | ND                 | +                        | +                                         | +                                | +                                      | -                             | Yes                                              | +                             | -                   | -                                        | -                    | -                                            |                                                                                                        |
| 070036-0001 | F   | 48           | +                                        | +                  | +                        | +                                         | +                                | +                                      | -                             | Yes                                              | +                             | -                   | -                                        | -                    | -                                            |                                                                                                        |
| 120047-0001 | M   | 26           | +                                        | ND                 | ND                       | ND                                        | +                                | +                                      | -                             | Yes                                              | +                             | -                   | -                                        | -                    | -                                            |                                                                                                        |
| 120089-0001 | M   | 34           | +                                        | -                  | +                        | +                                         | +                                | +                                      | -                             | Yes                                              | +                             | -                   | -                                        | -                    | -                                            |                                                                                                        |
| 220012-0001 | M   | 46           | +                                        | +                  | +                        | +                                         | +                                | +                                      | +                             | Yes                                              | +                             | -                   | -                                        | -                    | -                                            |                                                                                                        |
| 610022-0001 | F   | 47           | +                                        | +                  | +                        | +                                         | +                                | ND                                     | +                             | Yes                                              | +                             | -                   | -                                        | -                    | -                                            |                                                                                                        |
| 040007-0001 | M   | 48           | +                                        | +                  | -                        | +                                         | +                                | +                                      | -                             | Yes                                              | +                             | +                   | -                                        | -                    | -                                            | Cousin with progressive paraparesis                                                                    |
| 041161-0001 | M   | 44           | +                                        | -                  | -                        | -                                         | +                                | +                                      | -                             | Yes                                              | +                             | +                   | -                                        | +                    | -                                            | Aunt with MS                                                                                           |
| 041268-0001 | M   | 26           | +                                        | +                  | -                        | +                                         | +                                | ND                                     | -                             | Yes                                              | +                             | +                   | -                                        | -                    | -                                            |                                                                                                        |
| 041278-0001 | F   | 51           | +                                        | -                  | -                        | -                                         | +                                | +                                      | -                             | Yes                                              | +                             | +                   | -                                        | -                    | -                                            |                                                                                                        |
| 041287-0001 | F   | 36           | +                                        | +                  | +                        | +                                         | +                                | +                                      | -                             | Yes                                              | +                             | +                   | -                                        | -                    | -                                            | 1st degree relative with epilepsy                                                                      |
| 041548-0001 | M   | 27           | +                                        | +                  | ND                       | +                                         | +                                | +                                      | -                             | Yes                                              | +                             | +                   | -                                        | -                    | -                                            |                                                                                                        |
| 041562-0001 | F   | 44           | +                                        | +                  | +                        | +                                         | +                                | +                                      | -                             | Yes                                              | +                             | +                   | -                                        | -                    | -                                            | Father with stroke                                                                                     |
| 041776-0001 | M   | 42           | +                                        | -                  | -                        | +                                         | +                                | ND                                     | +                             | Yes                                              | +                             | +                   | -                                        | -                    | -                                            | Migraine headaches                                                                                     |
| 510009-0001 | F   | 34           | +                                        | +                  | -                        | +                                         | +                                | +                                      | -                             | Yes                                              | +                             | +                   | -                                        | -                    | -                                            |                                                                                                        |
| 600129-0001 | M   | 41           | +                                        | ND                 | ND                       | ND                                        | +                                | +                                      | -                             | Yes                                              | +                             | +                   | -                                        | -                    | -                                            | Mother has seizures and dementia.                                                                      |
| 600256-0001 | M   | 33           | +                                        | +                  | +                        | +                                         | +                                | -                                      | -                             | Yes                                              | +                             | +                   | -                                        | +                    | -                                            | Father with MS, rheumatoid arthritis, Behcet's, asthma, Crohn's, hay fever.                            |
| 600316-0001 | F   | 51           | +                                        | +                  | +                        | +                                         | +                                | -                                      | -                             | Yes                                              | +                             | +                   | -                                        | -                    | +                                            | 1st degree relatives with epilepsy, schizophrenia. Mother with stroke and myeloproliferative disorder. |
| 600385-0001 | F   | 47           | +                                        | +                  | +                        | +                                         | +                                | -                                      | -                             | Yes                                              | +                             | +                   | -                                        | -                    | -                                            | Parkinson Disease.                                                                                     |
| 600428-0001 | F   | 41           | +                                        | -                  | -                        | -                                         | +                                | +                                      | -                             | Yes                                              | +                             | +                   | -                                        | -                    | -                                            |                                                                                                        |
| 600444-0001 | M   | 55           | +                                        | +                  | +                        | +                                         | +                                | -                                      | +                             | Yes                                              | +                             | +                   | -                                        | -                    | -                                            |                                                                                                        |
| 600506-0001 | F   | 35           | +                                        | ND                 | ND                       | ND                                        | +                                | +                                      | -                             | Yes                                              | +                             | +                   | -                                        | -                    | +                                            | Mother with ALS                                                                                        |
| 600582-0001 | M   | 54           | +                                        | ND                 | ND                       | ND                                        | +                                | +                                      | -                             | Yes                                              | +                             | +                   | -                                        | -                    | -                                            |                                                                                                        |
| 610005-0001 | M   | 52           | +                                        | +                  | +                        | +                                         | +                                | +                                      | -                             | Yes                                              | +                             | +                   | -                                        | -                    | -                                            |                                                                                                        |
| 650001-0001 | F   | 52           | +                                        | +                  | +                        | +                                         | +                                | +                                      | -                             | Yes                                              | +                             | +                   | -                                        | -                    | -                                            |                                                                                                        |
| 650008-0001 | F   | 50           | +                                        | +                  | +                        | +                                         | +                                | +                                      | -                             | Yes                                              | +                             | +                   | -                                        | -                    | -                                            |                                                                                                        |
| 650011-0001 | M   | 28           | +                                        | ND                 | ND                       | ND                                        | +                                | +                                      | -                             | Yes                                              | +                             | +                   | -                                        | -                    | -                                            |                                                                                                        |
| 650053-0001 | M   | 36           | +                                        | +                  | +                        | +                                         | +                                | +                                      | +                             | Yes                                              | +                             | +                   | -                                        | -                    | +                                            | Grandfather with unspecified neurologic disorder affecting legs                                        |
| 650075-0001 | F   | 51           | +                                        | ND                 | ND                       | ND                                        | +                                | +                                      | -                             | Yes                                              | +                             | +                   | -                                        | -                    | +                                            | Mother with stroke                                                                                     |
| 650084-0001 | F   | 48           | +                                        | -                  | +                        | +                                         | +                                | -                                      | -                             | Yes                                              | +                             | +                   | -                                        | -                    | -                                            |                                                                                                        |
| 650319-0001 | F   | 25           | +                                        | +                  | +                        | +                                         | +                                | +                                      | -                             | Yes                                              | +                             | +                   | -                                        | +                    | -                                            | Maternal aunt with MS                                                                                  |
| 020010-0001 | F   | 39           | +                                        | +                  | +                        | +                                         | +                                | ND                                     | -                             | Yes                                              | +                             | +                   | -                                        | +                    | -                                            | Cousin with MS                                                                                         |
| 040025-0001 | M   | 22           | +                                        | +                  | -                        | +                                         | +                                | ND                                     | -                             | Yes                                              | -                             | +                   | -                                        | -                    | -                                            |                                                                                                        |
| 041624-0001 | F   | 29           | +                                        | -                  | -                        | +                                         | +                                | +                                      | -                             | Yes                                              | -                             | +                   | -                                        | -                    | +                                            | Family history of bipolar disorder, migraines, depression                                              |
| 041770-1000 | M   | 53           | +                                        | +                  | -                        | +                                         | +                                | -                                      | -                             | Yes                                              | -                             | +                   | -                                        | +                    | -                                            |                                                                                                        |
| 150057-0001 | F   | 37           | +                                        | +                  | +                        | +                                         | +                                | -                                      | -                             | Yes                                              | -                             | +                   | -                                        | -                    | -                                            |                                                                                                        |
| 1580-0001   | M   | 28           | +                                        | +                  | ND                       | +                                         | +                                | ND                                     | -                             | Yes                                              | -                             | +                   | -                                        | +                    | +                                            | Sister with MS. Mother with stroke, epilepsy                                                           |
| 510014-0001 | M   | 64           | +                                        | +                  | +                        | +                                         | +                                | ND                                     | -                             | Yes                                              | -                             | +                   | -                                        | -                    | +                                            | Father with Parkinson's                                                                                |
| 510021-0001 | M   | 44           | +                                        | +                  | +                        | +                                         | +                                | -                                      | -                             | Yes                                              | -                             | +                   | -                                        | -                    | -                                            |                                                                                                        |
| 600031-0001 | M   | 28           | +                                        | ND                 | ND                       | ND                                        | +                                | +                                      | +                             | Yes                                              | -                             | +                   | -                                        | -                    | +                                            | Migraine headaches                                                                                     |
| 600216-0001 | M   | 60           | +                                        | +                  | -                        | +                                         | +                                | +                                      | -                             | Yes                                              | -                             | +                   | -                                        | -                    | -                                            |                                                                                                        |
| 600334-0001 | F   | 42           | +                                        | +                  | +                        | +                                         | +                                | ND                                     | -                             | Yes                                              | -                             | +                   | -                                        | -                    | +                                            | Parkinson's                                                                                            |
| 650016-0001 | F   | 62           | +                                        | +                  | +                        | +                                         | +                                | -                                      | -                             | Yes                                              | -                             | +                   | -                                        | -                    | -                                            |                                                                                                        |
| 650026-0001 | M   | 66           | +                                        | -                  | +                        | +                                         | +                                | -                                      | -                             | Yes                                              | -                             | +                   | -                                        | +                    | +                                            | Cousin with ALS, cousin's daughter with MS.                                                            |
| 650027-0001 | M   | 32           | +                                        | ND                 | ND                       | ND                                        | +                                | +                                      | -                             | Yes                                              | -                             | +                   | -                                        | -                    | -                                            |                                                                                                        |
| 650056-0001 | M   | 49           | +                                        | -                  | +                        | +                                         | +                                | -                                      | -                             | Yes                                              | -                             | +                   | -                                        | -                    | +                                            | Father with stroke                                                                                     |
| 650095-0001 | M   | 34           | +                                        | ND                 | ND                       | ND                                        | +                                | +                                      | -                             | Yes                                              | -                             | +                   | -                                        | +                    | -                                            | MS in paternal first cousin                                                                            |
| 650097-0001 | F   | 38           | +                                        | ND                 | ND                       | ND                                        | +                                | +                                      | -                             | Yes                                              | -                             | +                   | -                                        | -                    | +                                            | Father with partial myelitis                                                                           |
| 650139-0001 | M   | 36           | +                                        | ND                 | ND                       | ND                                        | +                                | +                                      | -                             | Yes                                              | -                             | +                   | -                                        | -                    | -                                            |                                                                                                        |
| 650142-0001 | M   | 51           | +                                        | ND                 | ND                       | ND                                        | +                                | +                                      | -                             | Yes                                              | -                             | +                   | -                                        | -                    | -                                            |                                                                                                        |
| 650304-0001 | M   | 32           | +                                        | +                  | -                        | +                                         | +                                | +                                      | +                             | Yes                                              | -                             | +                   | -                                        | +                    | -                                            | Father's cousin with MS                                                                                |
| 650320-0001 | M   | 47           | +                                        | +                  | +                        | +                                         | +                                | +                                      | -                             | Yes                                              | -                             | +                   | -                                        | -                    | -                                            |                                                                                                        |
| 650323-0001 | M   | 40           | +                                        | +                  | +                        | +                                         | +                                | +                                      | -                             | Yes                                              | -                             | +                   | -                                        | -                    | -                                            |                                                                                                        |
| 700019-0001 | F   | 61           | +                                        | +                  | +                        | +                                         | +                                | +                                      | +                             | Yes                                              | -                             | +                   | -                                        | -                    | -                                            |                                                                                                        |
