# Supplementary material
Source: PubMed Central journal article supplement (PMC6618123)
Supplement: ANA-84-51-s002.pdf [file ANA-84-51-s002.pdf]

Supplemental Table 2: Detailed clinical case reports in select MS phenocopy carriers

| Gene  | DNA change                        | Protein   | Inheritance | Disorder           | Reported in Literature                                        | Patient ID   | Diagnosis | Study Phase                         | Sex | Age of onset | Family History                                                                 | Clinical Symptoms                                                                                                                                                            | CSF                                                                                      | Brain imaging                                                                                                          | Spinal cord imaging                                                                    | Meets 2010 Criteria for PPMS | Treatment                                                                           | Platform       |
|-------|-----------------------------------|-----------|-------------|--------------------|---------------------------------------------------------------|--------------|-----------|-------------------------------------|-----|--------------|--------------------------------------------------------------------------------|------------------------------------------------------------------------------------------------------------------------------------------------------------------------------|------------------------------------------------------------------------------------------|------------------------------------------------------------------------------------------------------------------------|----------------------------------------------------------------------------------------|------------------------------|-------------------------------------------------------------------------------------|----------------|
| REEP1 | c.606+43G>T mRNA binding in 3'UTR | No change | AD          | SPG31              | Dominant variant for SPG31                                    | 65-0008      | PPMS      | WGS Discovery                       | F   | 50           | No MS or other neurologic disorders                                            | Spastic paraparesis, neurogenic bladder, mild ataxia, mild sensory deficits, left optic atrophy.                                                                             | IgG index 1.1, > 5 OCBs                                                                  | > 10 multifocal T2 hyperintensities in brain consistent with demyelination                                             | Patchy T2 signal in cervical spinal cord                                               | +                            | Tecfidera, failed Abagio due to hypertension. Copaxone, solumedrol.                 | CGI, OpenArray |
|       |                                   |           |             |                    |                                                               | 52-0139      | PPMS      | Replication Phase 1, UCSF cohort    | F   | 26           | Diabetes, hypertension, macular degeneration. No MS.                           | Foot drop at presentation. Severe spastic quadriplegia, preserved sensation, moderate to severe dysphagia                                                                    | LP performed at NIH in 1977 was reported to be consistent with MS, results not available | 21 punctate FLAIR hyperintense lesions in the supratentorial white matter and pons and pontomedullary junction.        | Patchy T2 signal in the cervical spinal cord, cervical spinal cord atrophy at C3-C6    | +                            | None                                                                                | OpenArray      |
|       |                                   |           |             |                    |                                                               | 52-1859      | PPMS      | Replication Phase 1, UCSF cohort    | M   | 57           | Cancer, hypertension. No MS                                                    | Lower extremity sensory changes, mild spastic paraparesis, bilateral intranuclear ophthalmoplegia neurogenic bladder, diminished reflexes at ankles suggestive of neuroanath | Not done                                                                                 | Multiple ovoid foci of increased T2 signal in corpus callosum, bilateral periventricular and subcortical white matter. | Not done                                                                               | not enough data              | Tecfidera, Betaseron                                                                | OpenArray      |
|       |                                   |           |             |                    |                                                               | 21-0003      | RMS       | Replication Phase 2, UCSF cohort    | F   | 41           | No MS or other neurologic disorders                                            | Unilateral optic neuritis, bladder abnormalities, cognitive impairment, sensory abnormalities. Latest MSSS 3.9                                                               | Not done                                                                                 | Multifocal lesions in the brain, some enhancing, consistent with demyelination.                                        | Normal cervical spine imaging.                                                         | NA                           | Interferon                                                                          | OpenArray      |
|       |                                   |           |             |                    |                                                               | MSGENE02-528 | RMS       | Replication Phase 2, Italian cohort | F   | 21           | No MS or other neurologic disorders                                            | A left sensory and motor hemisyndrome, clinical relapses. Latest EDSS 2.5 at age 28                                                                                          | Positive OCBs                                                                            | Multiple T2 lesions in the brain consistent with demyelination                                                         | 3 lesions in the cervical spinal cord                                                  | NA                           | Interferon                                                                          | OpenArray      |
| KIF5A | c.1082C>T                         | p.A361 V  | AD          | SPG10              | Dominant variant for SPG10, reported age of onset is 35       | 02-0069      | PPMS      | WGS Discovery                       | F   | 37           | No MS or other neurologic disorders                                            | Spastic paraparesis, ataxia, vibratory sensory disturbance, bowel and bladder disturbance, cognitive disturbance, fatigue. 9 years to EDSS 6.0                               | Not done                                                                                 | 4 T2 lesions on brain MRI consistent with demyelination                                                                | Abnormal T2 signal in the thoracic spinal cord                                         | +                            | Copaxone, pulse dose solumedrol                                                     | CGI, OpenArray |
|       |                                   |           |             |                    |                                                               | MSGENE02-539 | RMS       | Replication Phase 2, Italian cohort | M   | 18           | No MS or other neurologic disorders                                            | Vibratory sensory loss, saccadic eye movements. Latest EDSS 1.5 at age 26.                                                                                                   | Positive unique OCBs                                                                     | Multiple T2 lesions in the brain consistent with demyelination                                                         | Not done                                                                               | NA                           | Interferon                                                                          | OpenArray      |
| MLC1  | c.274C>T                          | p.P92S    | AR          | MLC                | Heterozygote found in a carrier (father of patient with MLC)  | 04-1225      | PPMS      | WGS Discovery                       | F   | 51           | F: Died of MI at 64. M: Lung CA                                                | Progressive spastic paraparesis, urinary incontinence, intermittent vertigo.                                                                                                 | 4 unique OCBs, IgG index 1.04                                                            | T2 lesions in periventricular white matter, and cortical atrophy.                                                      | Cervical spondylosis, moderate stenosis of c-spine, no intrinsic cord abnormalities.   | +                            | No progression on Rituximab x 3 yrs, some progression on IV solumedrol x 12 months. | CGI, OpenArray |
|       |                                   |           |             |                    |                                                               | 52-1463      | RMS       | Replication Phase 2, UCSF cohort    | F   | 15           | Mother with stroke, sister with epilepsy.                                      | Minimal motor symptoms, few clinical attacks. Latest EDSS < 6.0 at age 55.                                                                                                   | Not done                                                                                 | Mild burden of disease in the periventricular, pericallosal, and subcortical white matter.                             | Not done                                                                               | NA                           | Betaseron                                                                           | OpenArray      |
|       |                                   |           |             |                    |                                                               | 60-0354      | RMS       | Replication Phase 2, UCSF cohort    | F   | 37           | Asthma, hay fever, ulcerative colitis, breast and prostate cancer.             | Spastic paraparesis, bowel and bladder abnormalities, cognitive impairment, sensory abnormalities                                                                            | Not done                                                                                 | Greater than 10 T2 hyperintense lesions in the brain, some enhancing.                                                  | Multiple T2 lesions in cervical and thoracic spinal cord consistent with demyelination | NA                           | Avonex                                                                              | OpenArray      |
|       |                                   |           |             |                    |                                                               | 60-0362      | RMS       | Replication Phase 2, UCSF cohort    | F   | 35           | Rheumatoid arthritis, migraines, cardiovascular disease.                       | Mild spastic paraparesis, neurogenic bladder                                                                                                                                 | Not done                                                                                 | Moderate to severe burden of white matter abnormalities in supratentorial and infratentorial brain, some enhancing.    | One lesion in the upper cervical spinal cord                                           | NA                           | Copaxone, Rebif, Gilenya                                                            | OpenArray      |
|       |                                   |           |             |                    |                                                               | 50-0032      | RMS       | Replication Phase 2, UCSF cohort    | F   | 30           | No MS or other neurologic disorders                                            | not available for review                                                                                                                                                     | Not done                                                                                 | not available for review                                                                                               | not available for review                                                               | NA                           | unavailable                                                                         | OpenArray      |
| TSC2  | c.223G>A                          | p.E75K    | AD          | Tuberous Sclerosis | p.E75G (not p.E75K) was found in a patient with TS            | 60-0385      | PPMS      | WGS Discovery                       | F   | 47           | Mother with stroke and myeloproliferative disorder, father with cardiovascular | Mild spastic hemiparesis, mild sensory and cerebellar signs. EDSS 3 at age 62.                                                                                               | > 5 OCBs, IgG index 0.74                                                                 | > 10 T2 lesions in the corpus callosum, juxtacortical, deep and periventricular white matter                           | One T2 lesion in cervical spinal cord                                                  | +                            | Gilenya. Discontinued therapy at age 60 due to clinical and radiographic stability  | CGI, OpenArray |
| SPG7  | c.1529C>T                         | p.A510V   | AR, AD      | SPG7               | Reported dominant and recessive, most common mutation in SPG7 | 70-0019      | PPMS      | MS chip Discovery                   | F   | 61           | No MS or other neurologic disorders                                            | Mild asymmetric leg weakness and mild urinary urgency. Latest EDSS 2.0 at age 67.                                                                                            | > 5 OCBs, IgG index 0.9                                                                  | Moderate burden (more than 10 lesions) of disease in the periventricular and subcortical white matter                  | Two lesions in the cervical spinal cord                                                | +                            | None                                                                                | MS chip        |
| SPG7  | c.1552+1G>T Splice site           | -         | AR, AD      | SPG7               | Recessive mutation for SPG7                                   | 65-0084      | PPMS      | MS chip Discovery                   | F   | 48           | No history of MS or neurologic disease in the patient's parents and 5 siblings | Severe spastic paraparesis, moderate bladder symptoms, and moderate sensory deficits. Latest EDSS 6.5 at age 57.                                                             | 3 OCBs                                                                                   | Multifocal white matter lesions in the brain white matter consistent with demyelination                                | Multiple T2 lesions in the cervical spinal cord                                        | +                            | CellCept                                                                            | MS chip        |
