# Supplementary material
Source: PubMed Central journal article supplement (PMC6618123)
Supplement: ANA-84-51-s003.pdf [file ANA-84-51-s003.pdf]

Supplemental Table 3. PPM2 patients who carry a potentially deleterious phenocopy variant

| Clinical characteristics |        |     |              |                      |                         |                    |                   |                                |           |                 |                        |                          | Genetic Variants |               |                    |                 |                    | Genotyping Method |                        | Variant annotations (Ingenuity Variant Analysis) |                     |          |                  |            |            |            |                   |                              |                    |                                              |                          |            |                                |                             |                 |               |                        |                        |                              |                                |                         |                |               |                |                |                |
|--------------------------|--------|-----|--------------|----------------------|-------------------------|--------------------|-------------------|--------------------------------|-----------|-----------------|------------------------|--------------------------|------------------|---------------|--------------------|-----------------|--------------------|-------------------|------------------------|--------------------------------------------------|---------------------|----------|------------------|------------|------------|------------|-------------------|------------------------------|--------------------|----------------------------------------------|--------------------------|------------|--------------------------------|-----------------------------|-----------------|---------------|------------------------|------------------------|------------------------------|--------------------------------|-------------------------|----------------|---------------|----------------|----------------|----------------|
| Cohort                   | ID     | Sex | Age at onset | Family history of MS | Progression since onset | Elevated IgG index | Oligoclonal bands | Positive CSF (p0 index or OCs) | Brain MRI | Spinal cord MRI | Cocclusion enhancement | Meigs 2018 Criteria PPM2 | Gene             | Variant Type  | Transcript Variant | Protein Variant | Phenocopy Disorder | Inheritance       | Reported in literature | WGS                                              | MS replication chip | OpenKary | Genomic position | Ref allele | Alt allele | CADD Score | MAF ExAC European | Inferred Functional Activity | Translation Impact | Classification by Ingenuity Variant Analysis | SIFT Function Prediction | SIFT Score | PolyPhen-2 Function Prediction | Conservation phyloP p-value | Regulatory Site | APC Frequency | APC European Frequency | 1000 Genomes Frequency | NHLBI ESP European Frequency | ExAC Frequency All populations | ExAC European Frequency | gnp            |               |                |                |                |
| Discovery                | 650368 | F   | 37           | -                    | -                       | ND                 | ND                | ND                             | +         | +               | -                      | Yes                      | SPF5A            | Missense      | c.238C>T           | p.A231V         | SPD10              | AD                | +                      | ND                                               | ND                  | +        | 11,970,413       | C          | T          | 23.1       | 0.02%             | loss                         | missense           | Uncertain Significance                       | Tolerated                | 0.3        | Benign                         | 1.15E-05                    | -               | 0.03          | 0.03                   | 0.02                   | -                            | 0.03                           | 0.03                    | 0.02           | 0.03          | 0.03           | 12,394,041 C>T |                |
| Discovery                | 041223 | F   | 51           | -                    | -                       | +                  | +                 | +                              | +         | -               | -                      | Yes                      | MLC1             | Missense      | c.274C>T           | p.P253          | MLC                | AR                | +                      | ND                                               | ND                  | +        | 22,502,182       | G          | A          | 26.8       | 0.04%             | loss                         | missense           | Uncertain Significance                       | -                        | -          | 4.25E-05                       | -                           | 0.011           | 0.004         | -                      | -                      | 0.011                        | 0.004                          | -                       | 0.011          | 0.004         | 22,501,820 C>T |                |                |
| Discovery                | 650362 | F   | 47           | -                    | -                       | +                  | +                 | +                              | +         | -               | -                      | Yes                      | SCZ3             | Missense      | c.223A>G           | p.E75K          | TS                 | AD                | +                      | ND                                               | ND                  | +        | 12,912,045       | G          | A          | 24.9       | 0.01%             | normal                       | missense           | Uncertain Significance                       | Damaging                 | 0.02       | Benign                         | 3.12E-08                    | -               | 0.032         | 0.02                   | -                      | 0.032                        | 0.02                           | -                       | 0.032          | 0.02          | 16,130,465 G>A |                |                |
| Discovery                | 650008 | F   | 50           | -                    | -                       | +                  | +                 | +                              | +         | -               | -                      | Yes                      | REEP1            | Splicing site | c.606-430>T        | -               | SPD31              | AD                | +                      | ND                                               | ND                  | +        | 2,864,480        | C          | A          | 16.22      | 0.11%             | normal                       | synonymous         | Likely Benign                                | -                        | -          | -                              | -                           | 0.073           | 0.116         | -                      | -                      | 0.073                        | 0.116                          | -                       | 0.073          | 0.116         | 2,864,418 G>A  |                |                |
| Discovery                | 650319 | F   | 25           | +                    | -                       | +                  | +                 | +                              | +         | +               | -                      | Yes                      | SPD11            | Missense      | c.628C>T           | p.R209C         | SPD11              | AR                | +                      | ND                                               | ND                  | +        | 15,448,971       | G          | A          | 35         | 0.04%             | loss                         | missense           | Uncertain Significance                       | Damaging                 | 0          | Probably Damaging              | 3.88E-07                    | -               | 0.03          | 0.043                  | -                      | -                            | 0.03                           | 0.043                   | -              | 0.03          | 0.043          | 15,448,971 G>A |                |
| Discovery                | 000200 | F   | 28           | -                    | -                       | +                  | +                 | +                              | +         | ND              | -                      | Yes                      | KIAA1248         | Missense      | c.253A>C           | p.H82Y          | SPD8               | AD                | +                      | ND                                               | ND                  | +        | 8,126,589        | G          | A          | 19.53      | 0.00%             | normal                       | missense           | Uncertain Significance                       | Tolerated                | 0.74       | Benign                         | 4.19E-05                    | -               | 0.003         | 0                      | -                      | 0.003                        | 0                              | -                       | 0.003          | 0             | 8,126,589 G>A  |                |                |
| Discovery                | 041807 | F   | 36           | -                    | -                       | +                  | +                 | +                              | +         | +               | -                      | Yes                      | RTN6             | Missense      | c.620G>T           | p.H76L          | SGP12              | AD                | +                      | ND                                               | ND                  | +        | 19,408,110       | C          | A          | 27         | 0.00%             | normal                       | missense           | Uncertain Significance                       | -                        | -          | Benign                         | 3.15E-03                    | -               | 0.001         | 0                      | -                      | 0                            | 0                              | -                       | 0              | 0.001         | 0              | 19,408,110 C>A |                |
| Discovery                | 650053 | M   | 36           | -                    | -                       | +                  | +                 | +                              | +         | +               | -                      | Yes                      | SPFA7            | Splice Site   | c.1350+10>A        | -               | SPG4               | AD                | +                      | ND                                               | ND                  | +        | 2,328,465        | G          | A          | 27.7       | 0.00%             | loss                         | -                  | -                                            | Putogenic                | -          | -                              | 8.86E-06                    | -               | -             | -                      | -                      | -                            | -                              | -                       | -              | -             | 2,328,465 G>A  |                |                |
| Discovery                | 041282 | F   | 46           | -                    | -                       | +                  | +                 | +                              | +         | +               | -                      | Yes                      | SPD11            | Missense      | c.673C>T           | p.L231F         | SPD11              | AR                | +                      | ND                                               | ND                  | +        | 15,448,982       | G          | A          | 25         | 0.17%             | normal                       | missense           | Uncertain Significance                       | Tolerated                | 0.06       | Possibly Damaging              | 1.12E-03                    | -               | 0.15          | 0.178                  | 0.18                   | 0.221                        | 0.131                          | 0.173                   | 15,448,982 G>A |               |                |                |                |
| Discovery                | 041548 | M   | 27           | -                    | -                       | +                  | +                 | +                              | +         | +               | -                      | Yes                      | SPD21            | Missense      | c.2230A>A          | p.A71T          | SPD21              | AR                | +                      | ND                                               | ND                  | +        | 15,892,720       | C          | T          | 33         | 0.00%             | normal                       | missense           | Uncertain Significance                       | Damaging                 | 0.05       | Benign                         | 1.85E-04                    | -               | 0.003         | 0.002                  | -                      | -                            | 0.003                          | 0.002                   | -              | -             | 0.003          | 0.002          | 15,892,720 C>T |
| Discovery                | 150047 | M   | 28           | -                    | -                       | ND                 | ND                | +                              | +         | +               | -                      | Yes                      | AP2M1            | Missense      | c.1140G>A          | p.M36I          | SPD30              | AR                | +                      | ND                                               | ND                  | +        | 7,787,043        | G          | A          | 20.4       | 0.01%             | normal                       | missense           | Uncertain Significance                       | Tolerated                | 0.43       | Benign                         | 4.97E-05                    | -               | 0.05          | 0.028                  | 0.04                   | 0.04                         | 0.04                           | 0.04                    | 0.04           | 7,787,043 G>A |                |                |                |
| Discovery                | 650084 | F   | 48           | -                    | -                       | +                  | +                 | +                              | +         | +               | -                      | Yes                      | SPD7             | Splice Site   | c.135+10>T         | -               | SPD7               | AR                | +                      | ND                                               | ND                  | +        | 16,896,319       | G          | T          | 23.9       | 0.00%             | loss                         | -                  | -                                            | Likely Pathogenic        | -          | -                              | 8.91E-07                    | -               | 0.004         | 0.006                  | 0.06                   | 0.03                         | 0.003                          | 0.005                   | 0.003          | 0.005         | 16,896,319 G>T |                |                |
| Discovery                | 041807 | F   | 36           | -                    | -                       | +                  | +                 | +                              | +         | +               | -                      | Yes                      | CPYBP2           | Missense      | c.1057G>C          | p.R354L         | SPD20              | AR                | +                      | ND                                               | ND                  | +        | 4,108,640        | T          | C          | 23.2       | 0.00%             | normal                       | missense           | Uncertain Significance                       | Tolerated                | 0.11       | Possibly Damaging              | 1.56E-05                    | -               | 0.12          | 0.21                   | 0.16                   | 0.14                         | 0.187                          | 0.226                   | 0.14           | 0.187         | 4,108,640 T>C  |                |                |
| Discovery                | 041181 | M   | 44           | +                    | -                       | -                  | -                 | +                              | +         | +               | -                      | Yes                      | AP14B            | Missense      | c.1100G>A          | p.R367G         | SPD20              | AR                | +                      | ND                                               | ND                  | +        | 7,997,100        | G          | A          | 34         | 0.04%             | normal                       | missense           | Uncertain Significance                       | Tolerated                | 0.11       | Possibly Damaging              | 1.56E-05                    | -               | 0.005         | 0.04                   | 0.02                   | 0.028                        | 0.02                           | 0.028                   | 0.04           | 0.02          | 0.028          | 7,997,100 G>A  |                |
| Discovery                | 041181 | M   | 44           | +                    | -                       | -                  | -                 | +                              | +         | +               | -                      | Yes                      | KIAA1248         | Missense      | c.847C>T           | p.P216L         | SPD8               | AD                | +                      | ND                                               | ND                  | +        | 8,126,591        | G          | A          | 25.9       | 0.19%             | normal                       | missense           | Uncertain Significance                       | Tolerated                | 0.08       | Possibly Damaging              | 3.61E-06                    | -               | 0.14          | 0.183                  | 0.02                   | 0.209                        | 0.122                          | 0.194                   | 0.209          | 0.122         | 0.194          | 8,126,591 G>A  |                |
| Discovery                | 041181 | M   | 44           | +                    | -                       | -                  | -                 | +                              | +         | +               | -                      | Yes                      | IGBP4            | Missense      | c.1191G>C          | p.R397P         | SPD4               | AR                | +                      | ND                                               | ND                  | +        | 19,201,020       | C          | G          | 12.35      | 0.18%             | gain                         | missense           | Uncertain Significance                       | Adaptive                 | 1          | Benign                         | 3.91E-03                    | -               | 0.129         | 0.19                   | -                      | -                            | 0.129                          | 0.19                    | -              | -             | 0.129          | 0.19           | 19,201,020 C>G |
| Discovery                | 600129 | M   | 41           | -                    | -                       | ND                 | ND                | ND                             | +         | +               | -                      | Yes                      | SPD11            | Missense      | c.673C>T           | p.L231F         | SPD11              | AR                | +                      | ND                                               | ND                  | +        | 15,448,982       | G          | A          | 25         | 0.17%             | normal                       | missense           | Uncertain Significance                       | Tolerated                | 0.06       | Possibly Damaging              | 1.12E-03                    | -               | 0.14          | 0.177                  | 0.18                   | 0.221                        | 0.131                          | 0.173                   | 15,448,982 G>A |               |                |                |                |
| Discovery                | 600129 | M   | 41           | -                    | -                       | ND                 | ND                | ND                             | +         | +               | -                      | Yes                      | KP1A             | Missense      | c.337C>T           | p.P118L         | SPD20              | AR                | +                      | ND                                               | ND                  | +        | 22,918,075       | G          | A          | 31.2       | 0.04%             | normal                       | missense           | Uncertain Significance                       | Tolerated                | 0.51       | Benign                         | 1.35E-03                    | -               | 0.039         | 0.035                  | 0.05                   | 0.02                         | 0.012                          | 0.052                   | 0.048          | 0.012         | 0.052          | 22,918,075 G>A |                |
| Discovery                | 510039 | F   | 34           | -                    | -                       | -                  | -                 | +                              | +         | +               | -                      | Yes                      | KP2A             | Missense      | c.388C>T           | p.P122L         | SPD10              | AD                | +                      | ND                                               | ND                  | +        | 12,570,802       | G          | C          | 19.07      | 0.03%             | normal                       | missense           | Uncertain Significance                       | Tolerated                | 0.5        | Benign                         | 2.15E-03                    | -               | 0.037         | 0.039                  | 0.04                   | 0.07                         | 0.038                          | 0.036                   | 0.07           | 0.038         | 0.036          | 12,570,802 G>C |                |
| Discovery                | 600382 | M   | 54           | -                    | -                       | ND                 | ND                | ND                             | +         | +               | -                      | Yes                      | SD47             | Missense      | c.483A>C           | p.L228L         | CPD1               | AR                | +                      | ND                                               | ND                  | +        | 2,171,005        | A          | C          | 11.77      | 0.07%             | normal                       | missense           | Uncertain Significance                       | Tolerated                | 0.71       | Benign                         | 3.79E-04                    | -               | 0.026         | 0.042                  | 0.04                   | 0.047                        | 0.026                          | 0.037                   | 0.04           | 0.047         | 0.026          | 0.037          | 2,171,005 A>C  |
| Discovery                | 040007 | M   | 48           | -                    | -                       | +                  | -                 | +                              | +         | +               | -                      | Yes                      | KP1A             | Missense      | c.428C>T           | p.A148V         | SPD20              | AR                | +                      | ND                                               | ND                  | +        | 22,918,194       | G          | A          | 16.56      | 0.461%            | normal                       | missense           | Uncertain Significance                       | Tolerated                | 0.11       | Benign                         | 6.00E-04                    | -               | 0.345         | 0.631                  | 0.08                   | 0.516                        | 0.244                          | 0.461                   | 0.516          | 0.244         | 0.461          | 22,918,194 G>A |                |
| Discovery                | 650142 | M   | 51           | -                    | -                       | ND                 | ND                | ND                             | +         | +               | -                      | Yes                      | AP2D1            | Missense      | c.228T>G           | p.V763M         | SPD48              | AR                | +                      | ND                                               | ND                  | +        | 7,482,879        | G          | A          | 29.5       | 0.00%             | loss                         | missense           | Uncertain Significance                       | Damaging                 | 0          | Probably Damaging              | 1.75E-04                    | -               | 0.015         | 0.01                   | 0.02                   | 0.005                        | 0.005                          | 0.01                    | 0.009          | 0.005         | 0.01           | 0.009          | 7,482,879 G>A  |
| Discovery                | 700019 | F   | 61           | -                    | -                       | +                  | +                 | +                              | +         | +               | -                      | Yes                      | SPD7             | Missense      | c.1150G>C          | p.G364I         | SPD7               | AD                | +                      | ND                                               | ND                  | +        | 16,896,134       | C          | T          | 32         | 0.371%            | normal                       | missense           | Uncertain Significance                       | Damaging                 | 0          | Probably Damaging              | 8.91E-07                    | -               | 0.295         | 0.416                  | 0.22                   | 0.463                        | 0.252                          | 0.371                   | 0.252          | 0.371         | 16,896,134 C>T |                |                |
| Discovery                | 150057 | F   | 37           | -                    | -                       | +                  | +                 | +                              | +         | +               | -                      | Yes                      | PNPLA8           | Missense      | c.145T>C           | p.R49L          | SPD39              | AR                | +                      | ND                                               | ND                  | +        | 19,782,741       | C          | T          | 22.8       | 0.83%             | normal                       | missense           | Uncertain Significance                       | Tolerated                | 0.39       | Benign                         | 1.19E-04                    | -               | 0.522         | 0.841                  | 0.359                  | 0.687                        | 0.548                          | 0.839                   | 0.687          | 0.548         | 19,782,741 C>T |                |                |
| Discovery                | 510014 | M   | 64           | -                    | -                       | +                  | +                 | +                              | +         | ND              | -                      | Yes                      | YFSD7A           | Missense      | c.625C>A           | p.L20H          | SPD3               | AR                | +                      | ND                                               | ND                  | +        | 8,171,393        | C          | A          | 34         | 0.06%             | loss                         | missense           | Uncertain Significance                       | Damaging                 | 0.05       | Possibly Damaging              | 2.31E-05                    | -               | 0.036         | 0.041                  | -                      | -                            | 0.036                          | 0.041                   | -              | -             | 0.036          | 0.041          | 8,171,393 C>A  |
| Discovery                | 510051 | M   | 44           | -                    | -                       | +                  | +                 | +                              | +         | -               | -                      | Yes                      | JAK2B            | Missense      | c.574T>C           | p.R191          | SPD2               | AR                | +                      | ND                                               | ND                  | +        | 6,413,094        | T          | C          | 21.9       | 0.11%             | normal                       | missense           | Uncertain Significance                       | Tolerated                | 0.5        | Possibly Damaging              | 4.15E-05                    | -               | 0.081         | 0.087                  | -                      | -                            | 0.081                          | 0.087                   | -              | -             | 0.081          | 0.087          | 6,413,094 T>C  |
| Discovery                | 650095 | M   | 34           | -                    | -                       | ND                 | ND                | +                              | +         | -               | -                      | Yes                      | ZFYVE28          | Missense      | c.295C>T           | p.T293I         | SPD15              | AR                | +                      | ND                                               | ND                  | +        | 14,892,051       | G          | A          | 23.8       | 0.37%             | loss                         | missense           | Uncertain Significance                       | Damaging                 | 0.51       | Possibly Damaging              | 8.86E-04                    | -               | 0.247         | 0.357                  | 0.18                   | 0.38                         | 0.255                          | 0.372                   | 0.18           | 0.38          | 0.255          | 0.372          | 14,892,051 G>A |
| Replication              | 500189 | F   | 29           | -                    | -                       | Not available      | Not available     | +                              | +         | +               | -                      | Not enough data          | REEP1            | Splicing site | c.606-430>T        | -               | SPD31              | AD                | +                      | ND                                               | ND                  | +        | 2,864,480        | C          | A          | 16.22      | 0.11%             | normal                       | synonymous         | Likely Benign                                | -                        | -          | -                              | -                           | 0.073           | 0.116         | -                      | -                      | 0.073                        | 0.116                          | -                       | -              | 0.073         | 0.116          | 2,864,418 G>A  |                |
| Replication              | 500189 | M   | 57           | -                    | -                       | ND                 | ND                | ND                             | +         | ND              | -                      | Not enough data          | REEP1            | Splicing site | c.606-430>T        | -               | SPD31              | AD                | +                      | ND                                               | ND                  | +        | 2,864,480        | C          | A          | 16.22      | 0.11%             | normal                       | synonymous         | Likely Benign                                | -                        | -          | -                              | -                           | 0.073           | 0.116         | -                      | -                      | 0.073                        | 0.116                          | -                       | -              | 0.073         | 0.116          | 2,864,418 G>A  |                |

ND = not done
