# Supplementary material
Source: PubMed Central journal article supplement (PMC6618123)
Supplement: ANA-84-51-s004.pdf [file ANA-84-51-s004.pdf]

| Gene       | Variant      | Effect | AP4M1 | c.496C>T | p.P166S | -              | 0       | 0                               | 0 | 0 | 0 | 0 | 0 | 0 | 0.000  | 0.000  | 0.000  | 0.10%  | 0.00  | 0.00  | 0.00   | 0.007% | 0.004% | 0.000% | 0.012% | 0.004% | 0.006% | 25.4     | 1.75E-05               | Uncertain Significance | Damaging   | 0                 | Probably Damaging |
|------------|--------------|--------|-------|----------|---------|----------------|---------|---------------------------------|---|---|---|---|---|---|--------|--------|--------|--------|-------|-------|--------|--------|--------|--------|--------|--------|--------|----------|------------------------|------------------------|------------|-------------------|-------------------|
| exm639596  | 7.99701268   | C      | T     | missense | AP4M1   | c.496C>T       | p.P166S | -                               | 0 | 0 | 0 | 0 | 0 | 0 | 0.000  | 0.000  | 0.000  | 0.10%  | 0.00  | 0.00  | 0.00   | 0.007% | 0.004% | 0.000% | 0.012% | 0.004% | 0.006% | 25.4     | 1.75E-05               | Uncertain Significance | Damaging   | 0                 | Probably Damaging |
| exm639605  | 7.99702051   | C      | T     | missense | AP4M1   | c.611C>T       | p.S204F | -                               | 0 | 0 | 0 | 0 | 0 | 0 | 0.000  | 0.000  | 0.000  | 0.000% | 0.00  | 0.00  | 0.00   | 0.003% | 0.002% | 0.000% | 0.000% | 0.002% | 0.003% | 23.2     | 1.98E-03               | Uncertain Significance | Tolerated  | 0.68              | Possibly Damaging |
| exm639647  | 7.99704060   | G      | C     | missense | AP4M1   | c.1060G>C      | p.A354P | -                               | 0 | 0 | 0 | 0 | 0 | 0 | 0.000  | 0.000  | 0.000  | 0.000% | 0.00  | 0.00  | 0.00   | 0.043% | 0.026% | 0.000% | 0.012% | 0.021% | 0.036% | 27.7     | 1.96E-05               | Uncertain Significance | Tolerated  | 0.18              | Berign            |
| exm639648  | 7.99704079   | C      | A     | missense | AP4M1   | c.1079C>A      | p.A360D | -                               | 0 | 0 | 0 | 0 | 0 | 0 | 0.000  | 0.000  | 0.000  | 0.000% | NaN   | NaN   | NaN    | 0.000% | 0.019% | 0.040% | 0.000% | 0.016% | 0.021% | 22.1     | 9.29E-03               | Uncertain Significance | Tolerated  | 0.42              | Berign            |
| exm639649  | 7.99704100   | G      | A     | missense | AP4M1   | c.1100G>A      | p.R367D | -                               | 1 | 0 | 1 | 0 | 0 | 0 | 0.000  | 0.000  | 0.133% | 0.000% | 7.08  | 0.00  | 2.97   | 0.045% | 0.032% | 0.020% | 0.058% | 0.029% | 0.045% | 34       | 1.99E-05               | Uncertain Significance | Tolerated  | 0.11              | Berign            |
| exm1267516 | 8.17137944   | C      | G     | missense | VPS37A  | c.9861C>G      | p.L326V | -                               | 0 | 0 | 0 | 0 | 0 | 0 | 0.318% | 0.000% | 0.000% | 0.000% | NaN   | NaN   | NaN    | 0.000% | 0.004% | 0.020% | 0.000% | 0.012% | 0.000% | 26.4     | 1.92E-04               | Uncertain Significance | Damaging   | 0.04              | Berign            |
| exm1267520 | 8.17143910   | C      | T     | missense | VPS37A  | c.1168C>T      | p.H340Y | -                               | 0 | 0 | 0 | 0 | 0 | 0 | 0.000  | 0.000  | 0.000  | 0.000% | NaN   | NaN   | NaN    | 0.000% | 0.020% | 0.080% | 0.000% | 0.024% | 0.000% | 25.5     | 1.49E-05               | Uncertain Significance | Tolerated  | 0.22              | Berign            |
| exm2466277 | 8.17142033   | G      | A     | missense | VPS37A  | c.1093C>T      | p.H329Y | -                               | 0 | 0 | 0 | 0 | 0 | 0 | 0.000  | 0.000  | 0.000  | 0.000% | NaN   | NaN   | NaN    | 0.000% | 0.002% | 0.000% | 0.000% | 0.003% | 0.000% | 33       | 2.64E-06               | Uncertain Significance | Damaging   | 0                 | Possibly Damaging |
| exm684255  | 8.17133963   | C      | A     | missense | VPS37A  | c.1024A>G      | p.S344L | -                               | 1 | 0 | 1 | 1 | 0 | 0 | 0.637% | 0.170% | 0.089% | 0.000% | 9.65  | 2.58  | 1.35   | 0.066% | 0.041% | 0.000% | 0.058% | 0.036% | 0.061% | 34       | 2.31E-05               | Uncertain Significance | Damaging   | 0.05              | Possibly Damaging |
| exm684273  | 8.17137912   | C      | T     | missense | VPS37A  | c.946G>T       | p.A316T | -                               | 0 | 0 | 0 | 0 | 0 | 0 | 0.000  | 0.000  | 0.000  | 0.000% | NaN   | NaN   | NaN    | 0.000% | 0.007% | 0.000% | 0.000% | 0.006% | 0.000% | 21.5     | 1.41E-03               | Uncertain Significance | Tolerated  | 0.14              | Berign            |
| exm696249  | 8.38091917   | G      | T     | missense | DHD2    | c.825C>T       | p.T295I | -                               | 0 | 0 | 0 | 0 | 0 | 0 | 0.000  | 0.000  | 0.000  | 0.000% | NaN   | NaN   | NaN    | 0.000% | 0.139% | 0.091% | 0.058% | 0.120% | 0.054% | 23.5     | 2.43E-03               | Uncertain Significance | Tolerated  | 0.08              | Berign            |
| exm696278  | 8.38103310   | C      | T     | missense | DHD2    | c.899C>T       | p.T300I | -                               | 0 | 0 | 2 | 0 | 0 | 0 | 0.000  | 0.000  | 0.089% | 0.000% | 0.00  | 0.00  | 4.68   | 0.019% | 0.012% | 0.000% | 0.012% | 0.013% | 0.020% | 23       | 5.72E-05               | Uncertain Significance | Damaging   | 0.05              | Berign            |
| exm696290  | 8.38103783   | C      | G     | missense | DHD2    | c.1090C>G      | p.Q364E | -                               | 0 | 0 | 0 | 0 | 1 | 0 | 0.318% | 0.000% | 0.000  | 0.000% | 63.69 | 0.00  | 0.00   | 0.005% | 0.003% | 0.000% | 0.023% | 0.004% | 0.008% | 25.8     | 6.71E-06               | Uncertain Significance | Damaging   | 0                 | Possibly Damaging |
| exm696329  | 8.38111229   | T      | A     | missense | DHD2    | c.2047A>A      | p.L326V | -                               | 0 | 0 | 3 | 2 | 0 | 5 | 0.637% | 0.341% | 0.578% | 0.101% | 1.34  | 0.72  | 1.21   | 0.476% | 0.297% | 0.100% | 0.221% | 0.255% | 0.425% | 28.7     | 3.87E-05               | Uncertain Significance | Damaging   | 0.01              | Possibly Damaging |
| exm703395  | 8.65509264   | G      | A     | missense | CYP7B1  | c.1234-6863C>T | p.R486C | HSPS                            | 0 | 0 | 1 | 1 | 0 | 0 | 0.000% | 0.511% | 0.133% | 0.101% | 0.00  | 4.69  | 1.22   | 0.109% | 0.070% | 0.060% | 0.116% | 0.070% | 0.117% | 29       | 4.35E-05               | Likely Pathogenic      | Damaging   | 0                 | Possibly Damaging |
| exm749625  | 9.35738127   | G      | T     | missense | GBA2    | c.2220A>A      | p.S740R | -                               | 0 | 0 | 0 | 0 | 0 | 0 | 0.000  | 0.000  | 0.000  | 0.10%  | 0.00  | 0.00  | 0.000% | 0.048% | 0.040% | 0.058% | 0.058% | 0.087% | 24.4   | 7.03E-07 | Uncertain Significance | Tolerated              | 0.34       | Possibly Damaging |                   |
| exm749661  | 9.35739712   | C      | T     | missense | GBA2    | c.1495G>A      | p.E499K | -                               | 0 | 0 | 2 | 0 | 1 | 1 | 0.000  | 0.170% | 0.133% | 0.000% | 12.74 | 6.81  | 5.34   | 0.025% | 0.015% | 0.000% | 0.036% | 0.015% | 0.025% | 18.16    | 3.37E-04               | Uncertain Significance | Tolerated  | 0.23              | Berign            |
| exm749675  | 9.35740293   | C      | G     | missense | GBA2    | c.1196G>C      | p.R399P | -                               | 1 | 2 | 4 | 0 | 0 | 2 | 0.637% | 0.852% | 0.400% | 0.608% | 3.42  | 4.58  | 2.15   | 0.186% | 0.131% | 0.000% | 0.186% | 0.129% | 0.190% | 12.35    | 4.91E-03               | Uncertain Significance | Activating | 1                 | Berign            |
| exm749695  | 9.35741033   | A      | G     | missense | GBA2    | c.815T>C       | p.V272A | -                               | 0 | 0 | 0 | 0 | 0 | 0 | 0.000  | 0.000  | 0.000  | 0.000% | NaN   | NaN   | NaN    | 0.000% | 0.032% | 0.160% | 0.000% | 0.028% | 0.000% | 25.9     | 6.14E-06               | Uncertain Significance | Tolerated  | 0.07              | Possibly Damaging |
| exm749700  | 9.35741796   | C      | T     | missense | GBA2    | c.659G>A       | p.G220D | -                               | 0 | 0 | 0 | 0 | 0 | 1 | 0.000  | 0.000  | 0.000  | 0.10%  | 0.00  | 0.00  | 0.000% | 0.009% | 0.000% | 0.000% | 0.014% | 0.024% | 25.8   | 7.94E-07 | Uncertain Significance | Tolerated              | 0.2        | Possibly Damaging |                   |
| exm847062  | 10.99498266  | C      | T     | missense | ZFY227  | c.32C>T        | p.P111L | -                               | 0 | 1 | 0 | 0 | 0 | 0 | 0.318% | 0.170% | 0.044% | 0.000% | 22.75 | 12.17 | 3.18   | 0.014% | 0.154% | 0.619% | 0.023% | 0.138% | 0.012% | 23.5     | 3.30E-03               | Uncertain Significance | Tolerated  | 0.26              | Berign            |
| exm847076  | 10.99502891  | C      | T     | missense | ZFY227  | 1599C>T        | p.L80F  | -                               | 0 | 0 | 0 | 0 | 0 | 0 | 0.000  | 0.000  | 0.000  | 0.000% | NaN   | NaN   | NaN    | 0.000% | 0.048% | 0.120% | 0.012% | 0.043% | 0.000% | 25.5     | 1.44E-03               | Uncertain Significance | Tolerated  | 0.11              | Possibly Damaging |
| exm847085  | 10.99504641  | C      | T     | missense | ZFY227  | c.1918-4590C>T | p.R44C  | -                               | 0 | 0 | 1 | 0 | 0 | 0 | 0.000  | 0.000  | 0.044% | 0.000% | 0.00  | 0.00  | 8.90   | 0.005% | 0.024% | 0.020% | 0.035% | 0.019% | 0.005% | 33       | 4.72E-05               | Uncertain Significance | Damaging   | 0                 | Possibly Damaging |
| exm847132  | 10.99519057  | A      | G     | stoploss | ZFY227  | c.494C>T       | p.R142C | -                               | 0 | 0 | 0 | 0 | 0 | 0 | 0.000  | 0.000  | 0.000  | 0.000% | NaN   | NaN   | NaN    | 0.000% | 0.000% | 0.000% | 0.012% | 0.002% | 0.006% | 19.87    | 2.38E-04               | Uncertain Significance | -          | -                 | -                 |
| exm1016848 | 12.57962833  | G      | A     | missense | KFSA    | c.802G>A       | p.A268T | -                               | 0 | 0 | 0 | 0 | 0 | 0 | 0.000  | 0.000  | 0.000  | 0.000% | 0.00  | 0.00  | 0.00   | 0.001% | 0.002% | 0.040% | 0.012% | 0.001% | 0.001% | 32       | 2.97E-04               | Uncertain Significance | Damaging   | 0                 | Possibly Damaging |
| exm1016858 | 12.57963802  | G      | C     | missense | KFSA    | c.1150G>C      | p.G384R | -                               | 2 | 1 | 1 | 0 | 0 | 2 | 0.637% | 0.170% | 0.133% | 0.000% | 16.76 | 4.48  | 3.51   | 0.038% | 0.039% | 0.000% | 0.070% | 0.037% | 0.039% | 19.07    | 2.15E-03               | Uncertain Significance | Tolerated  | 0.5               | Berign            |
| exm1016904 | 12.57970617  | G      | A     | missense | KFSA    | c.2272G>A      | p.E758K | -                               | 0 | 1 | 0 | 5 | 0 | 0 | 0.318% | 0.170% | 0.222% | 0.000% | 40.03 | 2.16  | 2.82   | 0.079% | 0.055% | 0.000% | 0.118% | 0.058% | 0.090% | 24       | 2.37E-04               | Uncertain Significance | Tolerated  | 0.34              | Berign            |
| exm104775  | 12.123741403 | G      | A     | missense | C12or85 | c.326G>A       | p.R109Q | -                               | 0 | 1 | 0 | 0 | 0 | 0 | 0.000  | 0.170% | 0.000  | 0.000% | NaN   | NaN   | Inf    | 0.000% | 0.003% | 0.000% | 0.000% | 0.002% | 0.000% | 35       | 1.47E-06               | Uncertain Significance | Damaging   | 0.01              | Possibly Damaging |
| exm104779  | 12.123741490 | A      | G     | missense | C12or85 | c.413A>G       | p.K138R | -                               | 0 | 0 | 1 | 0 | 0 | 1 | 0.000  | 0.000  | 0.089% | 0.000% | 0.00  | 0.00  | 8.09   | 0.011% | 0.045% | 0.140% | 0.023% | 0.043% | 0.014% | 22.3     | 3.29E-05               | Uncertain Significance | Tolerated  | 0.07              | Possibly Damaging |
| exm1062340 | 13.38090469  | G      | A     | missense | SPG20   | c.499C>T       | p.P167S | -                               | 0 | 0 | 0 | 0 | 0 | 0 | 0.000  | 0.000  | 0.000  | 0.000% | 0.00  | 0.00  | 0.00   | 0.027% | 0.017% | 0.020% | 0.000% | 0.013% | 0.004% | 24.4     | 9.10E-04               | Uncertain Significance | Damaging   | 0.02              | Possibly Damaging |
| exm1221617 | 13.38087874  | G      | A     | missense | SPG20   | c.1769G>T      | p.A590V | -                               | 0 | 0 | 0 | 1 | 0 | 0 | 0.000  | 0.170% | 0.000  | 0.000% | 0.00  | 42.59 | 0.00   | 0.004% | 0.006% | 0.040% | 0.000% | 0.034% | 0.003% | 24.1     | 1.97E-04               | Uncertain Significance | Damaging   | 0                 | Berign            |
| exm1095315 | 14.13153541  | G      | A     | missense | SPG20   | c.1031A>G      | p.L287W | -                               | 0 | 0 | 0 | 0 | 0 | 0 | 0.000  | 0.000  | 0.000  | 0.000% | 0.00  | 0.00  | 0.00   | 0.000% | 0.003% | 0.000% | 0.000% | 0.002% | 0.004% | 24.7     | 5.46E-06               | Uncertain Significance | -          | -                 | -                 |
| exm1095316 | 14.13153964  | T      | C     | missense | AP4S1   | c.154T>C       | p.Y32H  | -                               | 1 | 0 | 4 | 0 | 0 | 0 | 0.318% | 0.000% | 0.178% | 0.000% | 2.90  | 0.00  | 1.62   | 0.110% | 0.068% | 0.000% | 0.116% | 0.061% | 0.097% | 21.9     | 4.15E-05               | Uncertain Significance | Tolerated  | 0.5               | Possibly Damaging |
| exm1000690 | 14.151054710 | G      | C     | missense | ATL1    | c.196G>C       | p.E66Q  | -                               | 0 | 0 | 0 | 0 | 0 | 0 | 0.000  | 0.000  | 0.000  | 0.000% | 0.00  | 0.00  | 0.00   | 0.015% | 0.009% | 0.000% | 0.012% | 0.009% | 0.015% | 15.75    | 7.33E-07               | Uncertain Significance | Tolerated  | 0.29              | Berign            |
| exm1000693 | 14.151057698 | A      | G     | missense | ATL1    | c.322A>G       | p.T108A | Heterozygous Sensory Neuropathy | 0 | 0 | 0 | 0 | 0 | 2 | 0.000  | 0.000  | 0.089% | 0.000% | 0.00  | 0.00  | 2.17   | 0.041% | 0.025% | 0.000% | 0.000% | 0.018% | 0.033% | 15.45    | 9.71E-03               | Uncertain Significance | Tolerated  | 0.42              | Berign            |
| exm100725  | 14.15108482  | G      | A     | missense | ATL1    | c.1213G>A      | p.V405M | -                               | 0 | 0 | 0 | 0 | 0 | 0 | 0.000  | 0.000  | 0.000  | 0.000% | 0.00  | 0.00  | 0.00   | 0.008% | 0.005% | 0.020% | 0.012% | 0.004% | 0.007% | 19.5     | 5.33E-05               | Uncertain Significance | Tolerated  | 0.14              | Berign            |
| exm102360  | 14.53518639  | C      | A     | missense | DHD1    | c.2444G>T      | p.R815I | -                               | 0 | 0 | 0 | 0 | 0 | 0 | 0.000  | 0.000  | 0.000  | 0.000% | NaN   | NaN   | NaN    | 0.000% | 0.092% | 0.140% | 0.000% | 0.066% | 0.002% | 25.8     | 8.09E-03               | Uncertain Significance | Damaging   | 0.04              | Possibly Damaging |
| exm102387  | 14.53529754  | T      | C     | missense | DHD1    | c.1694A>G      | p.Q268R | -                               | 0 | 0 | 0 | 0 | 1 | 0 | 0.318% | 0.170% | 0.000  | 0.000% | 39.81 | 21.29 | 0.00   | 0.008% | 0.007% | 0.000% | 0.000% | 0.006% | 0.007% | 13.22    | 4.08E-05               | Uncertain Significance | Damaging   | 0.02              | Berign            |
| exm102404  | 14.53558575  | G      | A     | missense | DHD1    | c.1238C>T      | p.T406I | -                               | 0 | 0 | 0 | 0 | 0 | 0 | 0.000  | 0.000  | 0.000  | 0.000% | NaN   | NaN   | NaN    | 0.000% | 0.011% | 0.000% | 0.000% | 0.001% | 0.000% | 22.7     | 5.13E-05               | Uncertain Significance | Damaging   | 0.01              | Berign            |
| exm102409  | 14.53560055  | G      | T     | missense | DHD1    | c.1141C>A      | p.G274K | -                               | 0 | 0 | 1 | 0 | 0 | 0 | 0.000  | 0.000  | 0.044% | 0.000% | 0.00  | 0.00  | 1.85   | 0.024% | 0.015% | 0.000% | 0.047% | 0.015% | 0.025% | 22       | 7.55E-07               | Uncertain Significance | Tolerated  | 0.12              | Berign            |
| exm102418  | 14.53570437  | C</    |       |          |         |                |         |                                 |   |   |   |   |   |   |        |        |        |        |       |       |        |        |        |        |        |        |        |          |                        |                        |            |                   |                   |

| Accession       | RefSeq      | Gene | Exon | Intron      | Type    | Gene         | Exon     | Intron | Type | Accession | RefSeq | Gene | Exon | Intron | Type | Accession | RefSeq | Gene | Exon | Intron | Type | Accession | RefSeq | Gene   | Exon   | Intron | Type |        |        |        |        |        |        |        |          |          |                        |           |                   |                   |          |                        |                        |           |                   |                   |
|-----------------|-------------|------|------|-------------|---------|--------------|----------|--------|------|-----------|--------|------|------|--------|------|-----------|--------|------|------|--------|------|-----------|--------|--------|--------|--------|------|--------|--------|--------|--------|--------|--------|--------|----------|----------|------------------------|-----------|-------------------|-------------------|----------|------------------------|------------------------|-----------|-------------------|-------------------|
| exm1110193      | 14.68270902 | G    | A    | missense    | ZFYVE26 | c.1351C>T    | p.L451F  | -      | -    | 0         | 0      | 0    | 0    | 0      | 0    | 0         | 0      | 0    | 0    | 0      | 0    | 0.0000    | 0.0000 | 0.0000 | 0.0000 | 0.00   | 0.00 | 0.00   | 0.0451 | 0.0298 | 0.0000 | 0.0126 | 0.0211 | 0.0368 | 25.2     | 1.24E-05 | Uncertain Significance | Damaging  | 0                 | Probably Damaging |          |                        |                        |           |                   |                   |
| exm1110205      | 14.68272263 | G    | A    | missense    | ZFYVE26 | c.1090C>T    | p.P364S  | -      | -    | 0         | 0      | 0    | 0    | 0      | 0    | 0         | 0      | 0    | 0    | 0      | 0    | 0.0000    | 0.0000 | 0.0000 | 0.0000 | 0.00   | 0.00 | 0.00   | 0.0088 | 0.0064 | 0.0000 | 0.0000 | 0.0044 | 0.0078 | 25.3     | 1.98E-06 | Uncertain Significance | Damaging  | 0.03              | Probably Damaging |          |                        |                        |           |                   |                   |
| exm1110220      | 14.68274174 | C    | T    | missense    | ZFYVE26 | c.427G>A     | p.G276D  | -      | -    | 0         | 0      | 0    | 0    | 0      | 0    | 0         | 0      | 0    | 0    | 0      | 0    | 0.0000    | 0.0000 | 0.0444 | 0.0000 | 0.00   | 0.00 | 6.35   | 0.0071 | 0.0044 | 0.0000 | 0.0120 | 0.0048 | 0.0078 | 25.9     | 4.63E-05 | Uncertain Significance | Damaging  | 0.02              | Probably Damaging |          |                        |                        |           |                   |                   |
| exm1110256_ver4 | 14.68280745 | C    | T    | stopgain    | ZFYVE26 | c.231G>A     | p.W177*  | -      | -    | 0         | 0      | 0    | 0    | 0      | 0    | 0         | 0      | 0    | 0    | 0      | 0    | 0.0000    | 0.0000 | 0.0000 | 0.0000 | 0.00   | 0.00 | 0.00   | 0.0011 | 0.0001 | 0.0000 | 0.0126 | 0.0011 | 0.0011 | 37       | 5.14E-05 | Uncertain Significance | -         | -                 | -                 | -        |                        |                        |           |                   |                   |
| exm1128932      | 14.10288115 | C    | T    | missense    | TECP2R2 | c.823C>T     | p.T208I  | -      | -    | 0         | 0      | 0    | 0    | 0      | 0    | 0         | 0      | 0    | 0    | 0      | 0    | 0.0000    | 0.0000 | 0.0000 | 0.0000 | NaN    | NaN  | NaN    | 0.0000 | 0.0491 | 0.1800 | 0.0126 | 0.0421 | 0.0000 | 28.6     | 2.50E-04 | Uncertain Significance | Damaging  | 0                 | Possibly Damaging |          |                        |                        |           |                   |                   |
| exm1128979      | 14.10290031 | C    | T    | missense    | TECP2R2 | c.1477C>T    | p.P493S  | -      | -    | 0         | 0      | 0    | 0    | 0      | 0    | 0         | 0      | 0    | 0    | 0      | 0    | 0.0000    | 0.0000 | 0.0000 | 0.0000 | 0.00   | 0.00 | 0.00   | 0.0011 | 0.0326 | 0.0000 | 0.0120 | 0.0261 | 0.0000 | 10.82    | 3.58E-03 | Uncertain Significance | Tolerated | 0.7               | Benign            |          |                        |                        |           |                   |                   |
| exm1129060      | 14.10291275 | C    | T    | missense    | TECP2R2 | c.2966C>T    | p.T989M  | -      | -    | 0         | 0      | 0    | 0    | 0      | 0    | 1         | 0      | 0    | 0    | 0      | 0    | 0.0000    | 0.0000 | 0.0444 | 0.0000 | 0.00   | 0.00 | 2.47   | 0.0181 | 0.0233 | 0.0000 | 0.0350 | 0.0118 | 0.0181 | 24.9     | 9.64E-07 | Uncertain Significance | Damaging  | 0                 | Possibly Damaging |          |                        |                        |           |                   |                   |
| exm1129073      | 14.10291615 | C    | T    | missense    | TECP2R2 | c.3275C>T    | p.S1092L | -      | -    | 0         | 5      | 16   | 1    | 4      | 4    | 7         | 5      | 3    | 2    | 3      | 6    | 1         | 1      | 2      | 1      | 2      | 1    | 2.5487 | 2.0444 | 1.2461 | 1.3171 | 4.49   | 3.61   | 2.20   | 0.5674   | 0.4111   | 0.1200                 | 0.6880    | 0.4221            | 0.6091            | 28       | 2.11E-06               | Uncertain Significance | Damaging  | 0                 | Possibly Damaging |
| exm1129076      | 14.10291688 | G    | C    | missense    | TECP2R2 | c.3296G>T    | p.A1100S | -      | -    | 0         | 0      | 0    | 0    | 0      | 0    | 0         | 0      | 0    | 0    | 0      | 0    | 0.0000    | 0.0000 | 0.0000 | 0.0000 | 0.00   | 0.00 | 0.00   | 0.0011 | 0.0011 | 0.0000 | 0.0000 | 0.0011 | 0.0011 | 19.92    | 1.09E-04 | Uncertain Significance | Tolerated | 0.12              | Benign            |          |                        |                        |           |                   |                   |
| exm1129079      | 14.10291696 | C    | A    | missense    | TECP2R2 | c.3386C>A    | p.S1129Y | -      | -    | 0         | 0      | 1    | 0    | 0      | 0    | 1         | 0      | 0    | 0    | 1      | 0    | 0         | 0      | 0      | 0      | 0      | 0    | 0.0000 | 0.0000 | 0.2671 | 0.0000 | 0.00   | 0.00   | 0.0271 | 0.0360   | 0.0000   | 0.0000                 | 0.0000    | 0.0360            | 30                | 3.15E-06 | Uncertain Significance | Damaging               | 0         | Possibly Damaging |                   |
| exm1129114      | 14.10296323 | C    | T    | missense    | TECP2R2 | c.3797G>T    | p.G1266V | -      | -    | 0         | 0      | 0    | 0    | 0      | 0    | 0         | 0      | 0    | 0    | 0      | 0    | 0.0000    | 0.0000 | 0.0000 | 0.0000 | 0.00   | 0.00 | 0.00   | 0.0148 | 0.0008 | 0.0000 | 0.0351 | 0.0091 | 0.0171 | 25.9     | 4.27E-06 | Uncertain Significance | Damaging  | 0.01              | Possibly Damaging |          |                        |                        |           |                   |                   |
| exm1129115      | 14.10296396 | G    | A    | missense    | TECP2R2 | c.3991G>A    | p.G1331R | -      | -    | 0         | 0      | 0    | 0    | 0      | 0    | 0         | 0      | 0    | 0    | 0      | 0    | 0.0000    | 0.0000 | 0.0000 | 0.0000 | 0.00   | 0.00 | 0.00   | 0.0044 | 0.0044 | 0.0000 | 0.0233 | 0.0021 | 0.0031 | 33       | 1.05E-04 | Uncertain Significance | Damaging  | 0                 | Possibly Damaging |          |                        |                        |           |                   |                   |
| exm1129118      | 14.10296400 | G    | A    | missense    | TECP2R2 | c.4033G>A    | p.A1345T | -      | -    | 0         | 0      | 1    | 0    | 0      | 0    | 0         | 0      | 0    | 0    | 0      | 0    | 0.0000    | 0.0000 | 0.0444 | 0.0000 | 0.00   | 0.00 | 11.2   | 0.0044 | 0.1398 | 0.2201 | 0.0121 | 0.1251 | 0.0051 | 26.4     | 2.52E-06 | Uncertain Significance | Damaging  | 0.01              | Possibly Damaging |          |                        |                        |           |                   |                   |
| exm1129144      | 14.10290443 | G    | A    | missense    | TECP2R2 | c.2449G>A    | p.V817M  | -      | -    | 0         | 0      | 0    | 0    | 0      | 0    | 0         | 0      | 0    | 0    | 1      | 0    | 0         | 0      | 0      | 0      | 0      | 0    | 0.0000 | 0.0000 | 0.0000 | 0.1011 | NaN    | NaN    | NaN    | 0.0004   | 0.0611   | 0.1200                 | 0.0000    | 0.0611            | 0.0000            | 23.3     | 4.06E-05               | Uncertain Significance | Tolerated | 0.06              | Benign            |
| exm118028_ver3  | 14.68241828 | G    | C    | missense    | ZFYVE26 | c.5225C>G    | p.S1742C | -      | -    | 0         | 0      | 0    | 0    | 0      | 0    | 0         | 0      | 0    | 0    | 0      | 0    | 0.0000    | 0.0000 | 0.0000 | 0.0000 | NaN    | NaN  | NaN    | 0.0003 | 0.0434 | 0.1000 | 0.0000 | 0.0551 | 0.0000 | 28.9     | 5.20E-05 | Uncertain Significance | Damaging  | 0                 | Possibly Damaging |          |                        |                        |           |                   |                   |
| exm1181043      | 14.68249803 | A    | C    | missense    | ZFYVE26 | c.4086T>G    | p.C1356G | -      | -    | 0         | 0      | 0    | 0    | 0      | 0    | 0         | 2      | 0    | 0    | 0      | 0    | 0.0000    | 0.0000 | 0.0000 | 0.2031 | 0.00   | 0.00 | 0.00   | 0.0031 | 0.1891 | 0.4191 | 0.0000 | 0.2221 | 0.0021 | 22.7     | 7.35E-03 | Benign                 | Tolerated | 0.18              | Possibly Damaging |          |                        |                        |           |                   |                   |
| exm2274689      | 14.53513535 | T    | C    | missense    | DHD01   | c.2854A>G    | p.Y873C  | -      | -    | 0         | 0      | 0    | 0    | 0      | 0    | 0         | 0      | 0    | 0    | 0      | 0    | 0.0000    | 0.0000 | 0.0000 | 0.0000 | NaN    | NaN  | NaN    | 0.0004 | 0.0161 | 0.0400 | 0.0000 | 0.0181 | 0.0000 | 27.1     | 1.37E-05 | Uncertain Significance | Damaging  | 0                 | Possibly Damaging |          |                        |                        |           |                   |                   |
| exm141526_ver3  | 15.23060999 | A    | C    | missense    | NPA1    | c.818T>G     | p.V283I  | -      | -    | 0         | 0      | 0    | 0    | 0      | 0    | 0         | 0      | 0    | 0    | 0      | 0    | 0.0000    | 0.0000 | 0.0000 | 0.0000 | 0.00   | 0.00 | 0.00   | 0.0004 | 0.0711 | 0.0000 | 0.0000 | 0.0511 | 0.0000 | 23.9     | 4.37E-05 | Uncertain Significance | Tolerated | 0.07              | Benign            |          |                        |                        |           |                   |                   |
| exm1157476      | 15.44855500 | C    | G    | Splice Site | SPG11   | c.6715-10G>C | -        | SPG11  | -    | 0         | 0      | 0    | 0    | 0      | 0    | 0         | 0      | 0    | 0    | 0      | 0    | 0.0000    | 0.0000 | 0.0000 | 0.0000 | 0.00   | 0.00 | 0.00   | 0.0351 | 0.0211 | 0.0000 | 0.0121 | 0.0161 | 0.0291 | 25.5     | 2.27E-05 | Uncertain Significance | -         | -                 | -                 | -        |                        |                        |           |                   |                   |
| exm1157481      | 15.44856827 | G    | A    | missense    | SPG11   | c.6720C>T    | p.L2337F | -      | -    | 1         | 0      | 5    | 2    | 1      | 2    | 2         | 1      | 0    | 1    | 0      | 1    | 0         | 1      | 0      | 1      | 0      | 1    | 1.2744 | 0.3411 | 0.3111 | 0.3041 | 7.36   | 1.97   | 1.80   | 0.1731   | 0.1311   | 0.1800                 | 0.2211    | 0.1441            | 0.1771            | 25       | 1.12E-03               | Uncertain Significance | Tolerated | 0.06              | Possibly Damaging |
| exm1157493      | 15.44858173 | C    | T    | missense    | SPG11   | c.6878G>A    | p.R2293Q | -      | -    | 0         | 0      | 0    | 0    | 1      | 0    | 0         | 0      | 0    | 0    | 0      | 0    | 0.0000    | 0.0000 | 0.0000 | 0.0000 | 0.00   | 0.00 | 0.00   | 0.0231 | 0.0171 | 0.0200 | 0.0351 | 0.0161 | 0.0261 | 34       | 1.33E-03 | Uncertain Significance | Damaging  | 0.01              | Possibly Damaging |          |                        |                        |           |                   |                   |
| exm1157494      | 15.44858174 | G    | A    | missense    | SPG11   | c.6877C>T    | p.R2293W | -      | -    | 0         | 0      | 0    | 1    | 0      | 0    | 0         | 0      | 0    | 0    | 0      | 0    | 0.0000    | 0.0000 | 0.0444 | 0.0000 | 0.00   | 0.00 | 2.02   | 0.0221 | 0.0551 | 0.0400 | 0.0121 | 0.0621 | 0.0201 | 34       | 1.98E-03 | Uncertain Significance | Damaging  | 0                 | Possibly Damaging |          |                        |                        |           |                   |                   |
| exm1157521      | 15.44862776 | C    | T    | missense    | SPG11   | c.6538C>T    | p.R2180W | -      | -    | 0         | 0      | 0    | 0    | 0      | 0    | 0         | 0      | 0    | 0    | 0      | 0    | 0.0000    | 0.0000 | 0.0000 | 0.0000 | 0.00   | 0.00 | 0.00   | 0.0071 | 0.0091 | 0.0400 | 0.0000 | 0.0091 | 0.0071 | 34       | 6.56E-05 | Uncertain Significance | Damaging  | 0.02              | Possibly Damaging |          |                        |                        |           |                   |                   |
| exm1157524      | 15.44864905 | C    | T    | missense    | SPG11   | c.6424G>A    | p.A2027T | -      | -    | 0         | 0      | 0    | 0    | 0      | 0    | 0         | 0      | 0    | 0    | 0      | 0    | 0.0000    | 0.0000 | 0.0000 | 0.0000 | 0.00   | 0.00 | 0.00   | 0.0004 | 0.0251 | 0.0759 | 0.0121 | 0.2241 | 0.0091 | 34       | 1.27E-05 | Benign                 | Damaging  | 0                 | Benign            |          |                        |                        |           |                   |                   |
| exm1157566      | 15.44877834 | C    | A    | missense    | SPG11   | c.5121G>T    | p.E1070D | -      | -    | 0         | 1      | 1    | 0    | 0      | 0    | 1         | 0      | 1    | 0    | 1      | 0    | 1         | 0      | 1      | 0      | 1      | 0    | 0.3181 | 0.3411 | 0.0891 | 0.1011 | 3.93   | 4.21   | 1.10   | 0.0811   | 0.0651   | 0.0600                 | 0.1161    | 0.0641            | 0.0901            | 23.5     | 1.88E-05               | Uncertain Significance | Damaging  | 0.04              | Possibly Damaging |
| exm1157582      | 15.44884585 | T    | C    | missense    | SPG11   | c.4687A>G    | p.R1563G | -      | -    | 0         | 0      | 1    | 0    | 0      | 0    | 0         | 0      | 0    | 0    | 1      | 0    | 0         | 0      | 1      | 0      | 0      | 0    | 0.0000 | 0.1681 | 0.0891 | 0.0000 | 0.1531 | 0.0000 | 24.6   | 6.21E-05 | Benign   | Damaging               | 0         | Possibly Damaging |                   |          |                        |                        |           |                   |                   |
| exm1157619      | 15.44906706 | G    | C    | missense    | SPG11   | c.3425C>G    | p.S1142C | -      | -    | 0         | 0      | 0    | 0    | 0      | 0    | 0         | 0      | 0    | 0    | 0      | 0    | 0.0000    | 0.0000 | 0.0000 | 0.0000 | 0.00   | 0.00 | 0.00   | 0.0161 | 0.0111 | 0.0000 | 0.0121 | 0.0131 | 0.0151 | 17.08    | 4.73E-03 | Uncertain Significance | Tolerated | 0.06              | Possibly Damaging |          |                        |                        |           |                   |                   |
| exm1157647      | 15.44914006 | C    | A    | missense    | SPG11   | c.2571G>T    | p.W857C  | -      | -    | 0         | 0      | 0    | 0    | 0      | 0    | 0         | 0      | 0    | 0    | 0      | 0    | 0.0000    | 0.0000 | 0.0000 | 0.0000 | NaN    | NaN  | NaN    | 0.0000 | 0.0000 | 0.0000 | 0.0121 | 0.0000 | 0.0000 | 33       | 1.35E-04 | Uncertain Significance | Damaging  | 0                 | Possibly Damaging |          |                        |                        |           |                   |                   |
| exm1157656      | 15.44914544 | A    | C    | missense    | SPG11   | c.2318T>G    | p.V773G  | -      | -    | 0         | 0      | 0    | 0    | 0      | 0    | 1         | 1      | 0    | 1    | 0      | 0    | 0.0000    | 0.0000 | 0.0444 | 0.1011 | 0.00   | 0.00 | 4.04   | 0.0111 | 0.0081 | 0.0200 | 0.0231 | 0.0081 | 0.0141 | 28.4     | 7.59E-04 | Uncertain Significance | Damaging  | 0                 | Possibly Damaging |          |                        |                        |           |                   |                   |
| exm1157716      | 15.44944060 | C    | T    | stopgain    | SPG11   | c.1085G>A    | p.W362*  | -      | -    | 0         | 0      | 0    | 0    | 0      | 0    | 0         | 0      | 0    | 0    | 0      | 0    | 0.0000    | 0.0000 | 0.0000 | 0.0000 | 0.00   | 0.00 | 0.00   | 0.0011 | 0.0011 | 0.0000 | 0.0231 | 0.0021 | 0.0031 | 37       | 1.07E-04 | Uncertain Significance | -         | -                 | -                 | -        |                        |                        |           |                   |                   |
| exm1157720      | 15.44944355 | G    | C    | missense    | SPG11   | c.979C>G     | p.L322V  | -      | -    | 0         | 0      | 0    | 0    | 0      | 0    | 0         | 0      | 0    | 0    | 0      | 0    | 0.0000    | 0.0000 | 0.0000 | 0.0000 | 0.00   | 0.00 | 0.00   | 0.0231 | 0.0151 | 0.0200 | 0.0000 | 0.0121 | 0.0200 | 10.17    | 7.98E-04 | Uncertain Significance | Tolerated | 0.15              | Benign            |          |                        |                        |           |                   |                   |
| exm1157744      | 15.44951453 | G    | A    | missense    | SPG11   | c.491C>T     | p.S164L  | -      | -    | 0         | 0      | 0    | 0    | 0      | 0    | 0         | 0      | 0    | 0    | 0      | 0    | 0.0000    | 0.0000 | 0.0000 | 0.0000 | 0.00   | 0.00 | 0.00   | 0.0481 | 0.0241 | 0.0000 | 0.0471 | 0.0361 | 0.0431 | 25       | 3.88E-03 | Uncertain Significance | Tolerated | 0.17              | Benign            |          |                        |                        |           |                   |                   |
| exm1157745      | 15.44951501 | C    | T    | missense    | SPG11   | c.443G>A     | p.S148N  | -      | -    | 0         | 0      | 0    | 0    | 0      | 0    | 0         | 0      | 0    | 0    | 0      | 0    | 0.0000    | 0.0000 | 0.0000 | 0.0000 | 0.00   | 0.00 | 0.00   | 0.0031 | 0.0131 | 0.0600 | 0.0121 | 0.0121 | 0.0021 | 24.9     | 9.88E-05 | Uncertain Significance | Tolerated | 0.58              | Benign            |          |                        |                        |           |                   |                   |
| exm1161363      | 15.51201108 | G    | T    | missense    | AP4E1   | c.1335G>T    | p.A465S  | -      | -    | 0         | 0      | 0    | 0    | 0      | 0    | 0         | 0      | 0    | 0    | 0      | 0    | 0.0000    | 0.0000 | 0.0000 | 0.0000 | NaN    | NaN  | NaN    | 0.0003 | 0.0011 | 0.0000 | 0.0000 | 0.0011 | 0.0000 | 21       | 1.85     |                        |           |                   |                   |          |                        |                        |           |                   |                   |
