# Supplementary material
Source: PubMed Central journal article supplement (PMC6618123)
Supplement: ANA-84-51-s005.pdf [file ANA-84-51-s005.pdf]

**Supplemental Table 5: Sensitivity analysis for enrichment of HSP variants in 48 PPMS patients**

| Variant selection criteria |                                                    |                 |                                           |                                               | Variants within 58 HSP genes |                 |                      |               |                                    |
|----------------------------|----------------------------------------------------|-----------------|-------------------------------------------|-----------------------------------------------|------------------------------|-----------------|----------------------|---------------|------------------------------------|
| MAF < 1% in public cohorts | Functionally deleterious (missense or splice site) | CADD score > 10 | PhyloP Conservation <i>p-value</i> < 0.01 | Damaging in SIFT or PolyPhen2 (missense only) | # unique variants            | Mean in 48 PPMS | Mean in 100 controls | Relative Risk | Logistic regression <i>p-value</i> |
| +                          | +                                                  | -               | -                                         | -                                             | 368                          | 0.69            | 0.30                 | 2.29          | 0.0019                             |
| +                          | +                                                  | +               | -                                         | -                                             | 303                          | 0.52            | 0.19                 | 2.74          | 8.6 x 10 <sup>-4</sup>             |
| +                          | +                                                  | -               | +                                         | -                                             | 171                          | 0.29            | 0.12                 | 2.43          | 0.036                              |
| +                          | +                                                  | -               | -                                         | +                                             | 157                          | 0.25            | 0.11                 | 2.27          | 0.043                              |
| +                          | +                                                  | +               | +                                         | -                                             | <b>167</b>                   | <b>0.29</b>     | <b>0.11</b>          | <b>2.65</b>   | <b>0.028</b>                       |
| +                          | +                                                  | +               | +                                         | +                                             | 111                          | 0.15            | 0.05                 | 2.92          | 0.056                              |
