# Supplementary material
Source: PubMed Central journal article supplement (PMC6618123)
Supplement: ANA-84-51-s006.pdf [file ANA-84-51-s006.pdf]

**Supplemental Table 6: 41 spastic paraplegia genes**

| Condition       | Inheritance | Gene                 | Region        | Source      |
|-----------------|-------------|----------------------|---------------|-------------|
| SPG3A           | AD          | <i>ATL1</i>          |               | GeneReviews |
| SPG4            | AD          | <i>SPAST</i>         |               | GeneReviews |
| SPG6            | AD          | <i>NIPA1</i>         |               | GeneReviews |
| SPG8            | AD          | <i>KIAA0196</i>      |               | GeneReviews |
| SPG7            | AD, AR      | <i>SPG7</i>          |               | GeneReviews |
| SGP12           | AD          | <i>RTN2</i>          |               | GeneReviews |
| SGP13           | AD          | <i>HSPD1</i>         |               | GeneReviews |
| SPG10           | AD          | <i>KIF5A</i>         |               | GeneReviews |
| SPG17           | AD          | <i>BSCL2</i>         |               | GeneReviews |
| SPG31           | AD          | <i>REEP1</i>         |               | GeneReviews |
| SPG33           | AD          | <i>ZFYVE27</i>       |               | GeneReviews |
| SPG42           | AD          | <i>SLC33A1</i>       |               | GeneReviews |
| SPG5A           | AR          | <i>CYP7B1</i>        |               | GeneReviews |
| SPG11           | AR          | <i>SPG11</i>         |               | GeneReviews |
| SPG15           | AR          | <i>ZFYVE26</i>       |               | GeneReviews |
| SPG18           | AR          | <i>ERLIN2</i>        |               | GeneReviews |
| SPG20           | AR          | <i>SPG20 / SPART</i> |               | GeneReviews |
| SPG21           | AR          | <i>SPG21</i>         |               | GeneReviews |
| SPG28           | AR          | <i>DDHD1</i>         |               | GeneReviews |
| SPG30           | AR          | <i>KIF1A</i>         |               | GeneReviews |
| SPG35           | AR          | <i>FA2H</i>          |               | GeneReviews |
| SPG39           | AR          | <i>PNPLA6</i>        |               | GeneReviews |
| SPG43           | AR          | <i>C19orf12</i>      |               | GeneReviews |
| SPG44           | AR          | <i>GJC2 / Cx47</i>   |               | GeneReviews |
| SPG46           | AR          | <i>GBA2</i>          |               | GeneReviews |
| SPG47           | AR          | <i>AP4B1</i>         |               | GeneReviews |
| SPG48           | AR          | <i>AP5Z1</i>         |               | GeneReviews |
| SPG49           | AR          | <i>TECPR2</i>        |               | GeneReviews |
| SPG50           | AR          | <i>AP4M1</i>         |               | GeneReviews |
| SPG51           | AR          | <i>AP4E1</i>         |               | GeneReviews |
| SPG52           | AR          | <i>AP4S1</i>         |               | GeneReviews |
| SPG53           | AR          | <i>VPS37A</i>        |               | GeneReviews |
| SPG54           | AR          | <i>DDHD2</i>         |               | GeneReviews |
| SPG55           | AR          | <i>C12orf65</i>      |               | GeneReviews |
| SPG56           | AR          | <i>CYP2U1</i>        |               | GeneReviews |
| Complicated SPG | AR          | <i>GAD1</i>          |               | GeneReviews |
| Complicated SPG | AR          | <i>CCT5</i>          |               | GeneReviews |
| Complicated SPG | MT          | <i>ATP6</i>          |               | GeneReviews |
| SPG1            | XL          | <i>L1CAM</i>         |               | GeneReviews |
| SPG2            | XL          | <i>PLP1</i>          |               | GeneReviews |
| SPG22           | XL          | <i>SLC16A2</i>       |               | GeneReviews |
| SPG9            | AD          | <i>unknown</i>       | 10q23.3-q24.1 | GeneReviews |
| SPG19           | AD          | <i>unknown</i>       | 9q            | GeneReviews |
| SPG29           | AD          | <i>unknown</i>       | 1p31.1-21.1   | GeneReviews |
| SPG36           | AD          | <i>unknown</i>       | 12q23-q24     | GeneReviews |
| SPG37           | AD          | <i>unknown</i>       | 8p21.1-q13.3  | GeneReviews |
| SPG38           | AD          | <i>unknown</i>       | 4p16-p15      | GeneReviews |
| SPG40           | AD          | <i>unknown</i>       | Unknown       | GeneReviews |
| SPG41           | AD          | <i>unknown</i>       | 11p14.1-p11.2 | GeneReviews |
| SPG14           | AR          | <i>unknown</i>       | 3q27-q28      | GeneReviews |
| SPG23           | AR          | <i>unknown</i>       | 1q24-q32      | GeneReviews |
| SPG24           | AR          | <i>unknown</i>       | 13q14         | GeneReviews |
| SPG25           | AR          | <i>unknown</i>       | 6q23-q24.1    | GeneReviews |
| SPG26           | AR          | <i>unknown</i>       | 12p11.1-q14   | GeneReviews |
| SPG27           | AR          | <i>unknown</i>       | 10q22.1-q24.1 | GeneReviews |
| SPG32           | AR          | <i>unknown</i>       | 14q12-q21     | GeneReviews |
| SPG45           | AR          | <i>unknown</i>       | 10q24.3-q25.1 | GeneReviews |
| SPG16           | XL          | <i>unknown</i>       | Xq11.2        | GeneReviews |
| SPG34           | XL          | <i>unknown</i>       | Xq24-q25      | GeneReviews |
