# Supplementary material
Source: PubMed Central journal article supplement (PMC6618123)
Supplement: ANA-84-51-s007.pdf [file ANA-84-51-s007.pdf]

**Supplemental Table 7: 48 leukodystrophy genes**

| <b>Leukodystrophies</b>                                                                                      | <b>Inheritance</b> | <b>Gene(s)</b>  | <b>Source</b> |
|--------------------------------------------------------------------------------------------------------------|--------------------|-----------------|---------------|
| 18q deletion syndrome                                                                                        | de novo            | <i>MBP</i>      | GeneReviews   |
| AD adult-onset leukodystrophy(ADLD)                                                                          | AD                 | <i>LMNB1</i>    | GeneReviews   |
| Adult polyglucosan body disease(APBD)                                                                        | AR                 | <i>GBE1</i>     | GeneReviews   |
|                                                                                                              |                    | <i>ADAR</i>     | GeneReviews   |
|                                                                                                              |                    | <i>RNASEH2A</i> | GeneReviews   |
| Aicardi–Goutières syndrome (AGS)                                                                             | AR>AD              | <i>RNASEH2B</i> | GeneReviews   |
|                                                                                                              |                    | <i>RNASEH2C</i> | GeneReviews   |
|                                                                                                              |                    | <i>SAMHD1</i>   | GeneReviews   |
|                                                                                                              |                    | <i>TREX1</i>    | GeneReviews   |
| Alexander disease                                                                                            | AD                 | <i>GFAP</i>     | GeneReviews   |
| Canavan disease                                                                                              | AR                 | <i>ASPA</i>     | GeneReviews   |
| Cerebroretinal microangiopathy w/calcifications & cysts (CRMCC) 2                                            | Likely AR          | <i>CTC1</i>     | GeneReviews   |
| Cerebrotendinous xanthomatosis(CTX)                                                                          | AR                 | <i>CYP27A1</i>  | GeneReviews   |
| Free sialic acid storage disorders 3                                                                         | AR                 | <i>SLC17A5</i>  | GeneReviews   |
| Fucosidosis                                                                                                  | AR                 | <i>FUCA1</i>    | GeneReviews   |
| Galactocerebrosidase deficiency (Krabbe disease)                                                             | AR                 | <i>GALC</i>     | GeneReviews   |
| Hereditary diffuse leukoencephalopathy w/spheroids(HDLS) 6                                                   | AD                 | <i>CSF1R</i>    | GeneReviews   |
| Hypomyelination and congenital cataract (HCC)                                                                | AR                 | <i>FAM126A</i>  | GeneReviews   |
| Hypomyelination w/atrophy of the basal ganglia & cerebellum (H-ABC)                                          | Likely AD          | <i>TUBB4A</i>   | GeneReviews   |
| L-2-hydroxyglutaric aciduria                                                                                 | AR                 | <i>L2HGDH</i>   | GeneReviews   |
| Leukoencephalopathy w/brain stem & spinal cord involvement & lactate elevation (LBSL)                        | AR                 | <i>DARS2</i>    | GeneReviews   |
| Leukoencephalopathy w/thalamus and brain stem involvement & lactate elevation (LTBL)                         | AR                 | <i>EARS2</i>    | GeneReviews   |
| Megalencephalic leukodystrophy w/subcortical cysts (MLC)                                                     | AR                 | <i>HEPACAM</i>  | GeneReviews   |
|                                                                                                              |                    | <i>MLC1</i>     | GeneReviews   |
| Metachromatic leukodystrophy(MLD)                                                                            | AR                 | <i>ARSA</i>     | GeneReviews   |
| Multiple sulfatase deficiency (MSD)                                                                          | AR                 | <i>SUMF1</i>    | GeneReviews   |
| Neurofibromatosis                                                                                            | AD                 | <i>NF1</i>      | GeneReviews   |
| Oculodentodigital dysplasia (ODDD)                                                                           | AD>AR              | <i>GJA1</i>     | GeneReviews   |
| Pelizaeus-Merzbacher disease (PMD)                                                                           | XL                 | <i>PLP1</i>     | GeneReviews   |
| Pelizaeus-Merzbacher-like disease 1 (PMLD1)                                                                  | AR                 | <i>GJC2</i>     | GeneReviews   |
|                                                                                                              |                    | <i>PEX1</i>     | GeneReviews   |
| Peroxisome Biogenesis Disorders, Zellweger Syndrome Spectrum                                                 | AR                 | <i>PEX6</i>     | GeneReviews   |
|                                                                                                              |                    | <i>PEX26</i>    | GeneReviews   |
|                                                                                                              |                    | <i>POLR3A</i>   | GeneReviews   |
| Pol III-related leukodystrophies 8                                                                           | AR                 | <i>POLR3B</i>   | GeneReviews   |
| PSAP-related MLD 5                                                                                           | AR                 | <i>PSAP</i>     | GeneReviews   |
| RNAse T2-deficient leukoencephalopathy                                                                       | AR                 | <i>RNASET2</i>  | GeneReviews   |
| Single-enzyme deficiencies of peroxisomal fatty acid beta oxidation: Dibifunctional protein deficiency       | AR                 | <i>HSD17B4</i>  | GeneReviews   |
| Single-enzyme deficiencies of peroxisomal fatty acid beta oxidation: Peroxisomal acyl-CoA-oxidase deficiency | AR                 | <i>ACOX1</i>    | GeneReviews   |
| Single-enzyme deficiencies of peroxisomal fatty acid beta oxidation: SCPx deficiency                         | AR                 | <i>SCP2</i>     | GeneReviews   |
| Sjögren-Larsson syndrome                                                                                     | AR                 | <i>ALDH3A2</i>  | GeneReviews   |
| SOX10-associated disorders                                                                                   | AD                 | <i>SOX10</i>    | GeneReviews   |
|                                                                                                              |                    | <i>EIF2B2</i>   | GeneReviews   |
| Vanishing White Matter Disease, Childhood Ataxia with Central Nervous System Hypomyelination                 | AR                 | <i>EIF2B3</i>   | GeneReviews   |
|                                                                                                              |                    | <i>EIF2B4</i>   | GeneReviews   |
|                                                                                                              |                    | <i>EIF2B5</i>   | GeneReviews   |
|                                                                                                              |                    | <i>ALDP</i>     | GeneReviews   |
| X-linked adrenoleukodystrophy (X-ALD)                                                                        | XL                 | <i>ABCD1</i>    | GeneReviews   |
